# Supplementary material for: High-resolution fully-coupled atmospheric–hydrological modeling: across-compartment regional water and energy cycle evaluation
Source: Copernicus journal article supplement (doi:10.5194/hess-2019-478), 2019-10-21
Supplement: Supplementary file 1 [file hess-2019-478-supplement.pdf]

# Supplementary material

Additional tables and figures that were omitted in the manuscript for brevity.

Table S1: Performance measures for total absorbed shortwave radiation ( $\text{W m}^{-2}$ ), simulations vs. observations, June to October 2016.

| Station | Model    | $r^2$ | ME    | RMSE   |
|---------|----------|-------|-------|--------|
| DE-Fen  | WRF_SA   | 0.76  | 48.37 | 130.95 |
|         | WRF-H_FC | 0.77  | 49.51 | 130.27 |
| DE-RbW  | WRF_SA   | 0.73  | 47.65 | 135.72 |
|         | WRF-H_FC | 0.72  | 46.14 | 135.61 |
| DE-Gwg  | WRF_SA   | 0.66  | 68.16 | 162.10 |
|         | WRF-H_FC | 0.65  | 68.64 | 163.69 |

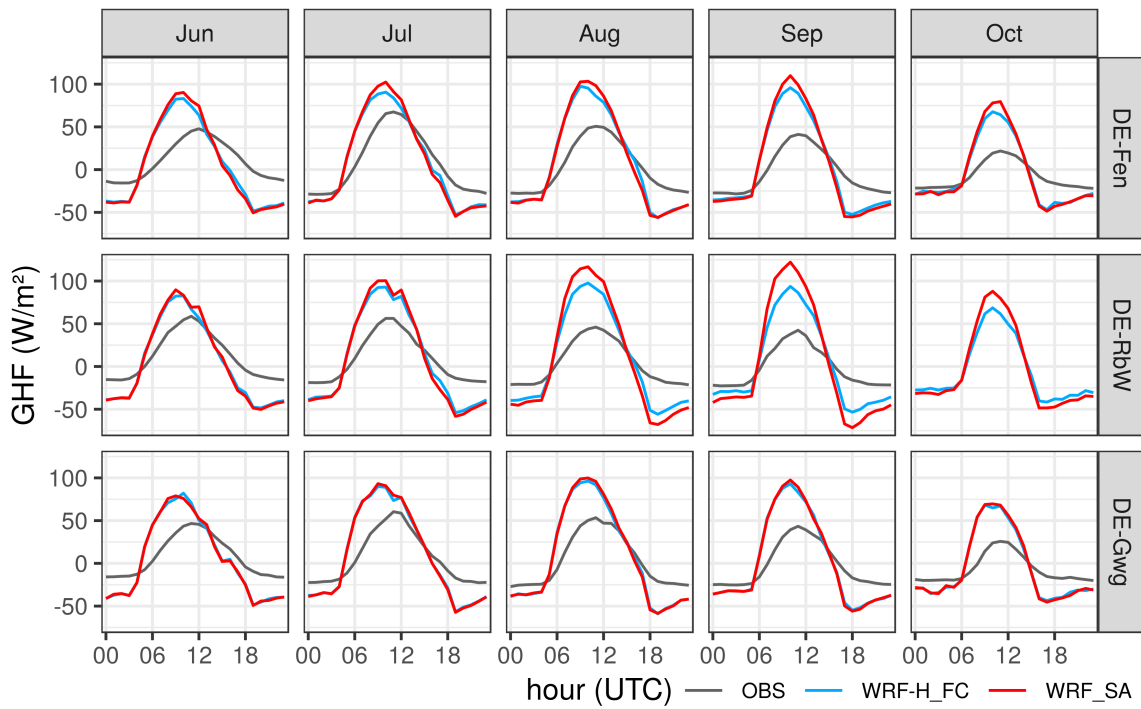

Figure S1: Mean diurnal cycles of simulated and observed ground heat flux for the months June to October 2016 at different TERENO-preAlpine sites.

Table S2: Performance measures for ground heat flux ( $\text{W m}^{-2}$ ), simulations vs. observations, June to October 2016.

| Station | Model    | $r^2$ | ME   | RMSE  |
|---------|----------|-------|------|-------|
| DE-Fen  | WRF_SA   | 0.60  | 2.57 | 38.49 |
|         | WRF-H_FC | 0.62  | 1.99 | 34.65 |
| DE-RbW  | WRF_SA   | 0.60  | 1.37 | 44.83 |
|         | WRF-H_FC | 0.63  | 0.97 | 35.98 |
| DE-Gwg  | WRF_SA   | 0.57  | 2.32 | 37.91 |
|         | WRF-H_FC | 0.56  | 2.05 | 37.23 |

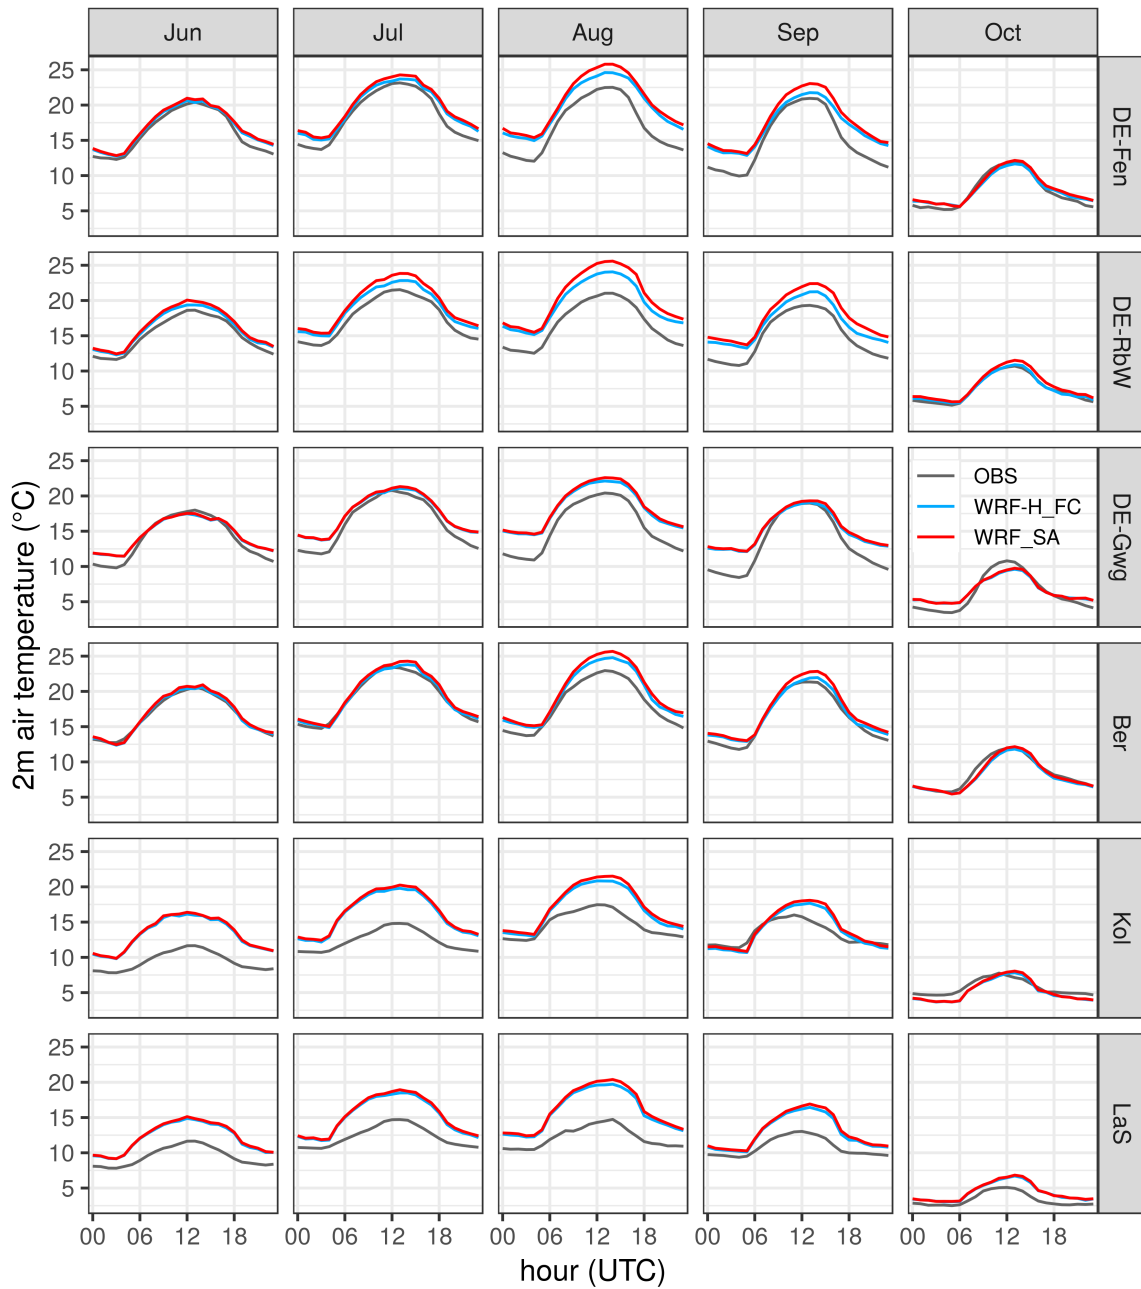

Figure S2: Supplemental: Mean diurnal cycles of simulated and observed 2 m air temperature for the months June to October 2016 at different TERENO-preAlpine sites.

Table S3: Performance measures for 2 m air temperature (K), simulations vs. observations, June to October 2016.

| Station | Model    | $r^2$ | ME   | RMSE |
|---------|----------|-------|------|------|
| DE-Fen  | WRF_SA   | 0.81  | 1.76 | 3.34 |
|         | WRF-H_FC | 0.81  | 1.32 | 3.04 |
| DE-RbW  | WRF_SA   | 0.84  | 2.06 | 3.35 |
|         | WRF-H_FC | 0.84  | 1.41 | 2.84 |
| DE-Gwg  | WRF_SA   | 0.79  | 1.40 | 3.16 |
|         | WRF-H_FC | 0.79  | 1.27 | 3.08 |
| Ber     | WRF_SA   | 0.85  | 0.72 | 2.57 |
|         | WRF-H_FC | 0.86  | 0.38 | 2.43 |
| Kol     | WRF_SA   | 0.77  | 2.19 | 3.73 |
|         | WRF-H_FC | 0.77  | 1.94 | 3.55 |
| LaS     | WRF_SA   | 0.81  | 2.66 | 3.80 |
|         | WRF-H_FC | 0.81  | 2.45 | 3.60 |

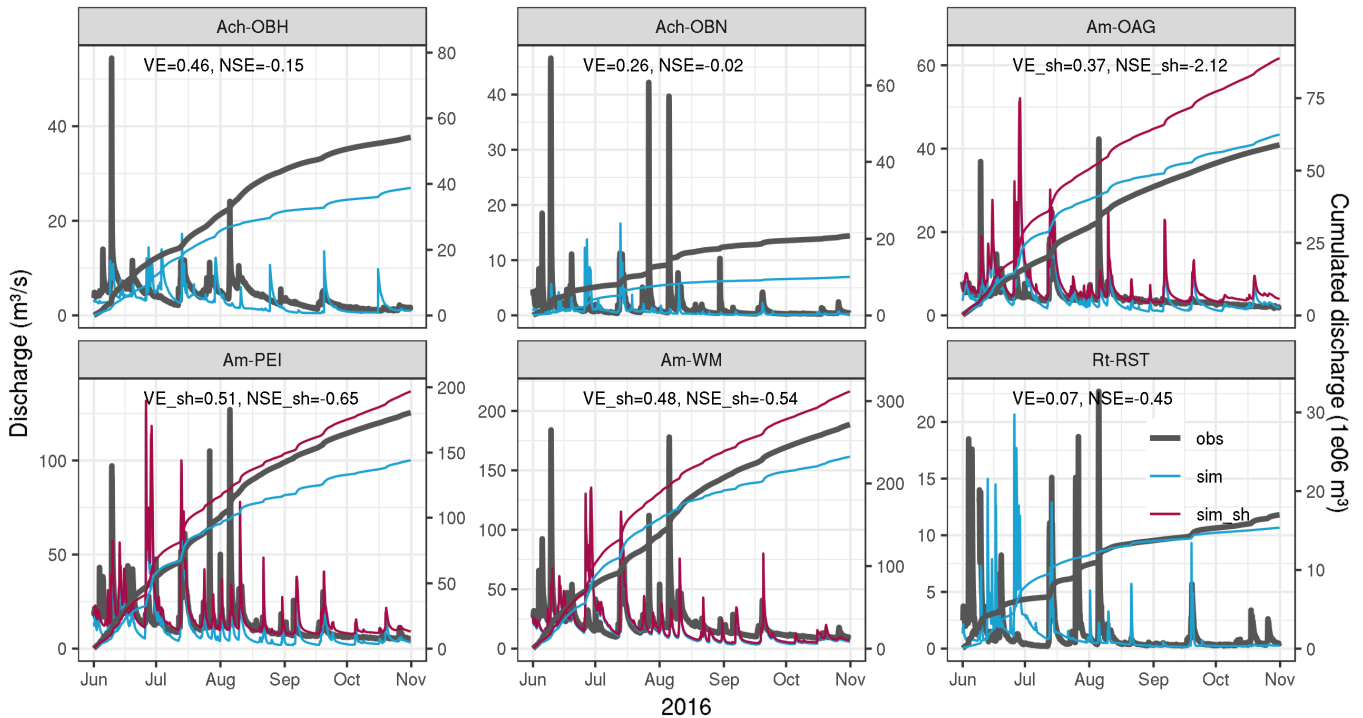

Figure S3: Subcatchment hydrographs for validation period. Standard WRF-H\_FC model output is printed in blue. Shifted (sh) hydrographs are shown in red. Shift amounts are listed in Tab. 3 of the manuscript.
